# Supplementary material for: Dietary factors and microRNA-binding site polymorphisms in the IL13 gene: risk and prognosis analysis of colorectal cancer
Source: PubMed Central journal article supplement (PMC5564572; doi:10.18632/oncotarget.17649), 2017-05-07
Supplement: oncotarget-08-47379-s001.pdf [file oncotarget-08-47379-s001.pdf]

## **Dietary factors and microRNA-binding site polymorphisms in the *IL13* gene: risk and prognosis analysis of colorectal cancer**

### **Supplementary Materials**

**Supplementary Table 1: The predicted biological impact of candidate SNPs located in microRNA-binding site of *IL13*. See Supplementary\_Table\_1**

**Supplementary Table 2: Univariate and multivariate logistic regression analyses for the association between environmental factors and colorectal cancer risk. See Supplementary\_Table\_2**

**Supplementary Table 3: Demographic and clinical pathological characteristics of colorectal cancer patients. See Supplementary\_Table\_3**

**Supplementary Table 4: Cox-regression on the association between clinical pathological characteristics, microRNA-binding site polymorphisms in *IL13* and the prognosis of CRC**

| Prognosis factor                            | Univariate analysis                   |                            | Multivariate analysis      |         |
|---------------------------------------------|---------------------------------------|----------------------------|----------------------------|---------|
|                                             | Mean survival times (months) (95% CI) | Hazard ratio (HR) (95% CI) | Hazard ratio (HR) (95% CI) | P value |
| <b>Location of primary tumor</b>            |                                       |                            |                            |         |
| Colon                                       | 77.17 (68.84–85.51)                   | 1                          |                            |         |
| Rectum                                      | 70.18 (64.81–75.55)                   | 1.37 (0.94–2.00)           |                            |         |
| <b>General classification of tumor</b>      |                                       |                            |                            |         |
| Protrude type                               | 81.08 (73.58–86.57)                   | 1                          | 1                          |         |
| Invasive and ulcerative type                | 61.70 (54.10–69.30)                   | 2.02 (1.44–2.84)           | 1.73 (1.23–2.44)           | 0.002   |
| Other types                                 | 11.50 (8.04–14.97)                    | 9.83 (1.32–73.23)          | 14.92 (1.95–14.47)         | 0.009   |
| <b>Histological classification of tumor</b> |                                       |                            |                            |         |
| Adenocarcinoma                              | 71.33 (66.22–76.43)                   | 1                          |                            |         |
| Mucinous adenocarcinoma                     | 75.75 (65.52–85.98)                   | 0.86 (0.56–1.33)           |                            |         |
| Other types                                 | 80.17 (51.38–108.95)                  | 0.55 (0.14–2.23)           |                            |         |
| <b>Stage of Dukes'</b>                      |                                       |                            |                            |         |
| I                                           | 92.44 (83.81–101.07)                  | 1                          | 1                          |         |
| II                                          | 85.27 (79.30–91.23)                   | 1.67 (0.78–3.54)           | 1.60 (0.71–3.61)           | 0.26    |
| III                                         | 59.70 (51.71–66.43)                   | 4.28 (2.06–8.90)           | 4.29 (1.95–9.42)           | < 0.001 |
| IV                                          | 22.35 (15.05–29.65)                   | 15.72 (6.78–36.48)         | 14.79 (5.97–36.66)         | < 0.001 |
| <b>Metastasis</b>                           |                                       |                            |                            |         |
| No                                          | 54.52 (47.72–61.32)                   | 1                          |                            |         |
| Yes                                         | 86.29 (81.12–91.47)                   | 3.11 (2.21–4.37)           |                            |         |
| <b>Chemotherapy treatment</b>               |                                       |                            |                            |         |
| No                                          | 73.85 (67.28–80.41)                   | 1                          |                            |         |
| Yes                                         | 72.11 (65.86–78.36)                   | 0.96 (0.69–1.34)           |                            |         |
| <b>rs847</b>                                |                                       |                            |                            |         |
| GG                                          | 67.82 (61.39–74.26)                   | 1                          |                            |         |
| AG                                          | 76.86 (70.13–83.60)                   | 0.72 (0.51–1.01)           |                            |         |
| AA                                          | 83.18 (65.97–100.38)                  | 0.51 (0.22–1.17)           |                            |         |
| <b>rs848</b>                                |                                       |                            |                            |         |
| GG                                          | 67.91 (61.48–74.35)                   | 1                          |                            |         |
| GT                                          | 76.08 (69.32–82.84)                   | 0.75 (0.53–1.06)           |                            |         |
| TT                                          | 78.80 (60.49–97.11)                   | 0.60 (0.28–1.30)           |                            |         |
| <b>rs1295685</b>                            |                                       |                            |                            |         |
| CC                                          | 66.94 (60.46–73.43)                   | 1                          |                            |         |
| CT                                          | 77.37 (70.59–84.14)                   | 0.69 (0.49–0.97)           |                            |         |
| TT                                          | 84.57 (68.08–101.06)                  | 0.47 (0.20–1.07)           |                            |         |
